# Supplementary material for: Randomized, double-blind trial of F14512, a polyamine-vectorized anticancer drug, compared with etoposide phosphate, in dogs with naturally occurring lymphoma
Source: PubMed Central journal article supplement (PMC7041934; doi:10.18632/oncotarget.27461), 2020-02-18
Supplement: oncotarget-11-671-s001.pdf [file oncotarget-11-671-s001.pdf]

# Randomized, double-blind trial of F14512, a polyamine-vectorized anticancer drug, compared with etoposide phosphate, in dogs with naturally occurring lymphoma

## SUPPLEMENTARY MATERIALS

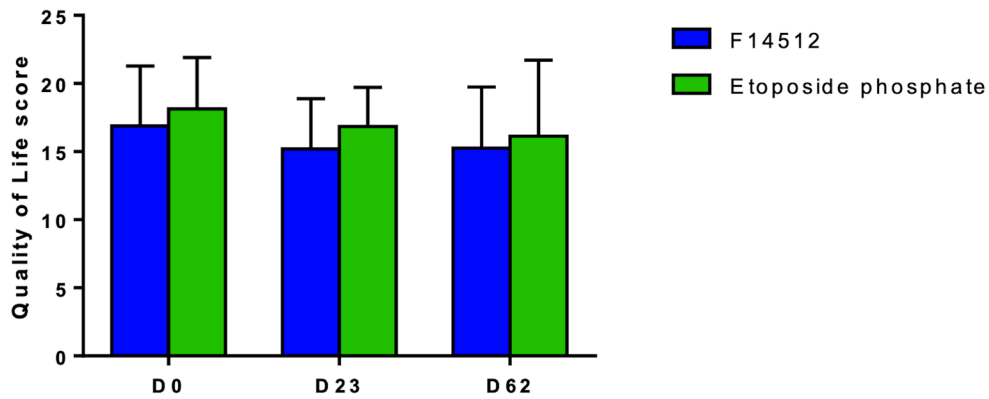

Supplementary Figure 1: Quality of life monitoring.

**Supplementary Table 1: Serum thymidine kinase 1 activity measured prior to treatment according to clinical characteristics**

| <b>Epidemiological characteristics</b> | <b>Number of dogs (%)</b> | <b>Pretreatment sTK1 activity, Du/L Median (range)</b> | <b>P value</b>       |
|----------------------------------------|---------------------------|--------------------------------------------------------|----------------------|
| <b>All population</b>                  | <b>48 (100%)</b>          | 1374 (20 – 60005)                                      |                      |
| <b>Prior treatment</b>                 |                           |                                                        | 0.15 <sup>a</sup>    |
| Untreated                              | 41 (85%)                  | 1638 (20 – 60005)                                      |                      |
| Prior chemotherapy                     | 7 (15%)                   | 334 (20 – 7269)                                        |                      |
| <b>Clinical stage</b>                  |                           |                                                        | 0.12 <sup>b</sup>    |
| Stage II                               | 2 (4%)                    | 20 (20 – 20)                                           |                      |
| Stage III                              | 8 (17%)                   | 1327 (20 – 3921)                                       |                      |
| Stage IV                               | 29 (60%)                  | 1638 (20 – 60005)                                      |                      |
| Stage V                                | 9 (19%)                   | 2994 (20 – 47453)                                      |                      |
| <b>Clinical substage</b>               |                           |                                                        | 0.025 <sup>a</sup>   |
| Substage a                             | 26 (54%)                  | 934 (20 – 47453)                                       |                      |
| Substage b                             | 22 (46%)                  | 3018 (20 – 60005)                                      |                      |
| <b>Immunophenotype</b>                 |                           |                                                        | < 0.001 <sup>a</sup> |
| B-cell lymphoma                        | 37 (77%)                  | 1688 (20 – 60005)                                      |                      |
| T-cell lymphoma                        | 7 (15%)                   | 38 (20 – 834)                                          |                      |
| <b>Cytomorphological Subtype</b>       |                           |                                                        | 0.18 <sup>a</sup>    |
| DLBCL                                  | 33 (69%)                  | 1688 (20 – 60005)                                      |                      |
| Others                                 | 15 (31%)                  | 834 (20 – 47453)                                       |                      |
| <b>Pgp</b>                             |                           |                                                        | 0.013 <sup>a</sup>   |
| Pgp- (neg and low)                     | 16 (33%)                  | 280 (20 – 47453)                                       |                      |
| Pgp+ (mid and high)                    | 28 (58%)                  | 2470 (20 – 60005)                                      |                      |
| <b>Treatment group</b>                 |                           |                                                        | 0.42 <sup>a</sup>    |
| F14512                                 | 25 (52%)                  | 1309 (20 – 47453)                                      |                      |
| Etoposide phosphate                    | 23 (48%)                  | 2551 (20 – 60005)                                      |                      |

DLBCL: Diffuse large B-cell lymphoma. Pgp: P-glycoprotein. (a) Wilcoxon rank test, (b) Kruskal-Wallis test.

**Supplementary Table 2. The clinical characteristics and outcome of dogs with low ( $\leq 0.5$  mg/mL,  $n = 27$ ) or high ( $> 0.5$  mg/mL,  $n = 21$ ) pretreatment D-dimer levels**

| Parameters                       | Number of dogs (%) | Number of dogs (%) with D-dimer $\leq 0.5$ $\mu\text{g/mL}$ | Number of dogs (%) with D-dimer $> 0.5$ $\mu\text{g/mL}$ | P value            |
|----------------------------------|--------------------|-------------------------------------------------------------|----------------------------------------------------------|--------------------|
| <b>Overall</b>                   | <b>48 (100%)</b>   | 27 (100%)                                                   | 21 (100%)                                                |                    |
| <b>Clinical Stage</b>            |                    |                                                             |                                                          | 0.15 <sup>a</sup>  |
| Stage II+III+IV                  | 39 (81%)           | 24 (89%)                                                    | 15 (71%)                                                 |                    |
| Stage V                          | 9 (19%)            | 3 (11%)                                                     | 6 (29%)                                                  |                    |
| <b>Clinical Substage</b>         |                    |                                                             |                                                          | 0.24 <sup>a</sup>  |
| Substage a                       | 26 (54%)           | 17 (63%)                                                    | 9 (43%)                                                  |                    |
| Substage b                       | 22 (46%)           | 10 (37%)                                                    | 12 (57%)                                                 |                    |
| <b>Immunophenotype</b>           |                    |                                                             |                                                          | 0.44 <sup>a</sup>  |
| B-cell                           | 37 (77%)           | 22 (82%)                                                    | 15 (71%)                                                 |                    |
| T-cell                           | 7 (15%)            | 3 (11%)                                                     | 4 (19%)                                                  |                    |
| <b>Cytomorphological Subtype</b> |                    |                                                             |                                                          | 0.76 <sup>a</sup>  |
| DLBCL                            | 33 (69%)           | 18 (67%)                                                    | 15 (71%)                                                 |                    |
| Others                           | 15 (31%)           | 9 (33%)                                                     | 6 (29%)                                                  |                    |
| <b>Prior treatment</b>           |                    |                                                             |                                                          | 0.12 <sup>a</sup>  |
| Untreated                        | 41 (85%)           | 21 (78%)                                                    | 20 (95%)                                                 |                    |
| Prior chemotherapy               | 7 (15%)            | 6 (22%)                                                     | 1 (5%)                                                   |                    |
| <b>Treatment group</b>           |                    |                                                             |                                                          | 1.0 <sup>a</sup>   |
| F14512                           | 25 (52%)           | 14 (52%)                                                    | 11 (52%)                                                 |                    |
| Etoposide phosphate              | 23 (48%)           | 13 (48%)                                                    | 10 (48%)                                                 |                    |
| <b>Pgp</b>                       |                    |                                                             |                                                          | 0.53 <sup>a</sup>  |
| Pgp- (neg and low)               | 16 (33%)           | 10 (37%)                                                    | 6 (29%)                                                  |                    |
| Pgp+ (mid and high)              | 28 (58%)           | 14 (52%)                                                    | 14 (67%)                                                 |                    |
| <b>Outcome</b>                   |                    |                                                             |                                                          |                    |
| ORR at D62                       | 22 (46%)           | 13 (48%)                                                    | 9 (43%)                                                  | 0.72 <sup>b</sup>  |
| PFS (range)                      | 86 (4-224)         | 104 (10-224)                                                | 54 (4-153)                                               | 0.011 <sup>c</sup> |

DLBCL: Diffuse large B-cell lymphoma, ORR: overall response rate, PFS: progression-free survival, Pgp: P-glycoprotein. (a) Fisher's exact test; (b) Chi-square test; (c) Log-rank test.

**Supplementary Table 3: Primary data.** See Supplementary Table 3.
